# Supplementary material
Source: publisher figshare collection journal article supplement (https://tandf.figshare.com/articles/dataset/_/24164392)
Supplement: Supplementary file 1 [file 1]

## Supplementary data 1

### Questionnaire form (in Finnish)

Kysely elintarvikepetosten torjunnasta paikallisissa ympäristöterveydenhuollon valvontayksiköissä

#### VASTAAJIEN NÄKEMYS VALVONTAKOhteista

Kuinka hyvin koet tuntevasi valvontakohteesi ja niiden toiminnan? Ota kantaa seuraaviin väittämiin:

1. Tunnen hyvin kohteen käyttämät elintarvikkeiden valmistusmenetelmät.

- ☐ kaikissa kohteissani
- ☐ useissa kohteissani
- ☐ harvoissa kohteissani
- ☐ ei yhdessäkään kohteessani
- ☐ en osaa sanoa

Tässä voit halutessasi tarkentaa vastaustasi:

2. Tunnen hyvin mitä raaka-aineita kohteessa käytetään.

- ☐ kaikissa kohteissani
- ☐ useissa kohteissani
- ☐ harvoissa kohteissani
- ☐ ei yhdessäkään kohteessani
- ☐ en osaa sanoa

Tässä voit halutessasi tarkentaa vastaustasi:

3. Tiedän kohteen valmistamat tuoteryhmät ja tuotteet.

- ☐ kaikissa kohteissani
- ☐ useissa kohteissani
- ☐ harvoissa kohteissani
- ☐ ei yhdessäkään kohteessani
- ☐ en osaa sanoa

Tässä voit halutessasi tarkentaa vastaustasi:

4. Tiedän, mistä kohde hankkii raaka-aineensa

- ☐ kaikissa kohteissani
- ☐ useissa kohteissani
- ☐ harvoissa kohteissani
- ☐ ei yhdessäkään kohteessani
- ☐ en osaa sanoa

Tässä voit halutessasi tarkentaa vastaustasi:

5. Tiedän, käyttääkö kohde vuokratyövoimaa

- ☐ kaikissa kohteissani
- ☐ useissa kohteissani
- ☐ harvoissa kohteissani
- ☐ ei yhdessäkään kohteessani
- ☐ en osaa sanoa

Tässä voit halutessasi tarkentaa vastaustasi:

6. Tiedän kohteen asiakasryhmät

- ☐ kaikissa kohteissani
- ☐ useissa kohteissani
- ☐ harvoissa kohteissani
- ☐ ei yhdessäkään kohteessani
- ☐ en osaa sanoa

Tässä voit halutessasi tarkentaa vastaustasi:

7. Minulla on käsitys yrityksen taloudellisesta tilanteesta

- ☐ kaikissa kohteissani
- ☐ useissa kohteissani
- ☐ harvoissa kohteissani
- ☐ ei yhdessäkään kohteessani
- ☐ en osaa sanoa

Tässä voit halutessasi tarkentaa vastaustasi:

8. Tiedän mitä yrityksen internetsivulla mainostetaan.

- ☐ kaikissa kohteissani
- ☐ useissa kohteissani
- ☐ harvoissa kohteissani
- ☐ ei yhdessäkään kohteessani
- ☐ en osaa sanoa

Tässä voit halutessasi tarkentaa vastaustasi:

9. Tiedän mitä yrityksen Facebook-sivulla tai muussa sosiaalisessa mediassa mainostetaan.

- ☐ kaikissa kohteissani
- ☐ useissa kohteissani
- ☐ harvoissa kohteissani
- ☐ ei yhdessäkään kohteessani
- ☐ en osaa sanoa

Tässä voit halutessasi tarkentaa vastaustasi:

Koen, että kohteiden tarkastustiheys on riittävä, jotta pystyn perehtymään riittävästi kohteiden toimintaan.

- ☐ kaikissa kohteissani
- ☐ useissa kohteissani
- ☐ harvoissa kohteissani
- ☐ ei yhdessäkään kohteessani
- ☐ en osaa sanoa

Tässä voit halutessasi tarkentaa vastaustasi:

Koen, että kohteiden tarkastuksiin varattu aika on riittävä, jotta pystyn perehtymään riittävästi kohteiden toimintaan.

- ☐ kaikissa kohteissani
- ☐ useissa kohteissani
- ☐ harvoissa kohteissani
- ☐ ei yhdessäkään kohteessani
- ☐ en osaa sanoa

Tässä voit halutessasi tarkentaa vastaustasi:

Tiedän, minkälaisia elintarvikepetoksia valvomissani kohdetyypeissä voisi tapahtua.

- ☐ täysin samaa mieltä
- ☐ osittain samaa mieltä
- ☐ osittain eri mieltä
- ☐ täysin eri mieltä
- ☐ en osaa sanoa

Tässä voit halutessasi tarkentaa vastaustasi:

## TARKASTUSTEN TEKEMINEN ELINTARVIKEHUONEISTOIHIN

Mitä seuraavista tarkastusmenetelmistä hyödynnät tehdessäsi tarkastuksia?

### 1. Pysähdyn seuraamaan toimintaa

- ☐ aina
- ☐ usein
- ☐ harvoin
- ☐ en koskaan
- ☐ en osaa sanoa

Tässä voit halutessasi tarkentaa vastaustasi:

### 2. Haastattelen linjatyöntekijöitä

- ☐ aina
- ☐ usein
- ☐ harvoin
- ☐ en koskaan
- ☐ en osaa sanoa

Tässä voit halutessasi tarkentaa vastaustasi:

### 3. Haastattelen johtoa

- ☐ aina
- ☐ usein
- ☐ harvoin
- ☐ en koskaan
- ☐ en osaa sanoa

Tässä voit halutessasi tarkentaa vastaustasi:

### 4. Haastattelen omaavalvonnasta vastaavia henkilöitä

- ☐ aina
- ☐ usein
- ☐ harvoin
- ☐ en koskaan
- ☐ en osaa sanoa

Tässä voit halutessasi tarkentaa vastaustasi:

### 5. Vertailen huoneistoon tulevien raaka-aineiden ja huoneistosta lähtevien tuotteiden määriä

- ☐ aina
- ☐ usein

- ☐ harvoin
- ☐ en koskaan
- ☐ en osaa sanoa

Tässä voit halutessasi tarkentaa vastaustasi:

6. Vertailen huoneistoon tulevien raaka-aineiden ja huoneistosta lähtevien sivutuotteiden määriä

- ☐ aina
- ☐ usein
- ☐ harvoin
- ☐ en koskaan
- ☐ en osaa sanoa

Tässä voit halutessasi tarkentaa vastaustasi:

7. Mittaan lämpötiloja itse

- ☐ aina
- ☐ usein
- ☐ harvoin
- ☐ en koskaan
- ☐ en osaa sanoa

Tässä voit halutessasi tarkentaa vastaustasi:

8. Pyydän avaamaan suljettuja kaappeja, kylmiöitä tai varastoja

- ☐ aina
- ☐ usein
- ☐ harvoin
- ☐ en koskaan
- ☐ en osaa sanoa

Tässä voit halutessasi tarkentaa vastaustasi:

Koen, että minulla on realistisia mahdollisuuksia havaita mahdollista petoksellista toimintaa tarkastuksilla.

- ☐ täysin samaa mieltä
- ☐ osittain samaa mieltä
- ☐ osittain eri mieltä
- ☐ täysin eri mieltä
- ☐ en osaa sanoa

Tässä voit halutessasi tarkentaa vastaustasi. Miksi tai miksi ei?

Ohjeiden mukaan suoritetuilla Oiva-tarkastuksilla jää tarkastamatta elintarvikepetosten havaitsemisen näkökulmasta olennaisia asioita.

- ☐ täysin samaa mieltä
- ☐ osittain samaa mieltä
- ☐ osittain eri mieltä
- ☐ täysin eri mieltä
- ☐ en osaa sanoa

Tässä voit halutessasi tarkentaa vastaustasi. Mitä asioita?

Onko valvonnassasi kohde tai kohteita, joihin tehtävät tarkastukset sovitaan aina etukäteen?

- ☐ kyllä

- ☐ ei
- ☐ en osaa sanoa

Tässä voit halutessasi tarkentaa vastaustasi:

Epäiletkö, että tarkastuksen tulos voisi olla erilainen, jos kohde tarkastettaisiin ennalta ilmoittamatta verrattuna ennalta ilmoitettuun tarkastukseen?

- ☐ kyllä
- ☐ ei
- ☐ en osaa sanoa

Tässä voit halutessasi tarkentaa vastaustasi:

## ELINTARVIKEPETOSTEN HAVAITSEMINEN

Onko sinulla viimeisen viiden vuoden aikana herännyt epäily petoksellisesta tai muusta elintarvikkeisiin liittyvästä rikollisesta toiminnasta jossakin valvontakohteessasi?

- ☐ kyllä
- ☐ ei
- ☐ en osaa sanoa

Tässä voit halutessasi tarkentaa vastaustasi:

Jos vastasit a-kohtaan "kyllä": miksi sinulle heräsi epäily petoksellisesta tai muusta rikollisesta toiminnasta tässä kohteessa tai kohteissa? Vastaa halutessasi lyhyesti.

Oletko viimeisen viiden vuoden aikana havainnut petoksellista tai muuta elintarvikkeisiin liittyvää rikollista toimintaa jossakin valvontakohteessasi?

- ☐ kyllä
- ☐ ei
- ☐ en osaa sanoa

Tässä voit halutessasi tarkentaa vastaustasi.

Jos vastasit a-kohtaan "kyllä", minkälaisesta tapauksesta tai tapauksista oli kyse? Vastaa halutessasi lyhyesti.

Jos vastasit a-kohtaan "kyllä": tehtiinkö asiassa tutkintapyyntö poliisille?

- ☐ kyllä
- ☐ ei
- ☐ en osaa sanoa

Tässä voit halutessasi tarkentaa vastaustasi:

Ennalta ilmoittamattomia tarkastuksia tulisi tarvittaessa tehdä myös virka-ajan ulkopuolella elintarvikelainsäädännön vastaisen toiminnan havaitsemiseksi.

- ☐ täysin samaa mieltä
- ☐ osittain samaa mieltä
- ☐ osittain eri mieltä
- ☐ täysin eri mieltä
- ☐ en osaa sanoa

Tässä voit halutessasi tarkentaa vastaustasi:

Jos epäilisin valvontakohteessani petoksellista toimintaa, tietäisin miten toimia.

- ☐ täysin samaa mieltä

- ☐ osittain samaa mieltä
- ☐ osittain eri mieltä
- ☐ täysin eri mieltä
- ☐ en osaa sanoa

Tässä voit halutessasi vielä tarkentaa vastauksiasi:

## ELINTARVIKEPETOSTEN SELVITTÄMINEN

Oletko joskus osallistunut

a. elintarvikepetospäilyn selvittämiseen?

- ☐ kyllä
- ☐ ei
- ☐ en osaa sanoa

Tässä voit halutessasi tarkentaa vastaustasi:

b. muuta elintarvikkeisiin liittyvää rikollista toimintaa koskevan epäilyn selvittämiseen?

- ☐ kyllä
- ☐ ei
- ☐ en osaa sanoa

Tässä voit halutessasi tarkentaa vastaustasi:

Minkälaista neuvontaa tai apua toivoisit saavasi tai kokisit tarvitsevasi, mikäli epäilisit valvontakohteessa elintarvikepetosta tai muuta elintarvikkeisiin liittyvää rikollista toimintaa?

Tiedätkö keneen poliisin edustajaan voisit olla yhteydessä keskustellaksesi asian selvittämisestä ja etenemisestä, mikäli epäilisit valvontakohteessa elintarvikepetosta tai muuta elintarvikkeisiin liittyvää rikollista toimintaa?

- ☐ kyllä
- ☐ ei
- ☐ en osaa sanoa

Tässä voit halutessasi tarkentaa vastaustasi:

Oletko laatinut tutkintapyynnön poliisille tai osallistunut tutkintapyynnön laatimiseen elintarvikkeita koskevassa asiassa?

- ☐ kyllä
- ☐ ei
- ☐ en osaa sanoa

Tässä voit halutessasi tarkentaa vastaustasi:

Minkälaiset asiat mielestäsi hankaloittavat tai voivat hankaloittaa elintarvikepetosepäilyjen selvittämistä?

## ELINTARVIKEPETOSTEN MERKITYS

Kuinka suurena ongelmana pidät elintarvikepetoksia Suomessa?

- ☐ 1 ei lainkaan ongelma
- ☐ 2
- ☐ 3
- ☐ 4

- ☐ 5 hyvin suuri ongelma
- ☐ en osaa sanoa

Tässä voit halutessasi tarkentaa vastaustasi:

Tässä voit kertoa vapaasti elintarvikepetoksiin tai muihin elintarvikelainsäädäntöön liittyviin rikkomuksiin, rikoksiin ja näiden epäilyihin liittyvistä kokemuksistasi:

## VASTAAJAN JA VALVONTAYKSIKÖN TIEDOT

Olen ympäristöterveydenhuollon valvontayksikön johtaja:

- ☐ kyllä
- ☐ ei

Olen eläinlääkäri:

- ☐ kyllä
- ☐ ei

Olen terveystarkastaja, elintarviketarkastaja tai vastaava:

- ☐ kyllä
- ☐ ei

Teen tarkastuksia elintarvikevalvontakohteisiin:

- ☐ kyllä
- ☐ ei

Koulutukseni on:

- ☐ ammattikoulututkinto
- ☐ alempi ammattikorkeakoulututkinto
- ☐ ylempi ammattikorkeakoulututkinto
- ☐ yliopistotutkinto
- ☐ muu, mikä?

Tässä voit tarkentaa vastaustasi, jos vastasit "muu, mikä":

Olen työskennellyt elintarvikevalvonnassa (yhteensä vuosina):

Elintarvikevalvontakohteitteni lukumäärä on (kpl):

Aluehallintovirasto, jonka alueella työskentelen:

- ☐ Etelä-Suomi
- ☐ Itä-Suomi
- ☐ Lappi
- ☐ Lounais-Suomi
- ☐ Länsi- ja Sisä-Suomi
- ☐ Pohjois-Suomi

Elintarvikevalvontaan kohdennetut henkilötyövuodet valvontayksikössä (htv):

Elintarvikevalvontakohteiden lukumäärä valvontayksikön alueella:

- ☐ alle 500 kpl
- ☐ 500-1000 kpl

- ☐ yli 1000 kpl
- ☐ en osaa sanoa

Valvontayksikön henkilöresurssit ovat mielestäni riittävät elintarvikevalvontaan.

- ☐ täysin riittävät
- ☐ jokseenkin riittävät
- ☐ ei lainkaan riittävät
- ☐ en osaa sanoa

Tässä voit tarvittaessa tarkentaa vastaustasi:

#### **PALAUTE**

Tässä voit halutessasi antaa palautetta kyselystä:



## Supplementary data 2

### Interview questions (in Finnish)

- Mitä ajattelet elintarvikepetoksista?
- Kuinka suurena ongelmana pidät elintarvikepetoksia Suomessa?
- Miten hyvin pystyt mielestäsi havaitsemaan mahdollisia elintarvikepetoksia tarkastuksilla?
- Onko valvontakohteiden toiminnassa jotakin sellaisia asioita, joiden tarkastaminen olisi elintarvikepetosten torjunnan näkökulmasta mielestäsi tärkeää, mutta joiden tarkastamiseen ei ole tällä hetkellä mahdollisuutta tai se on erittäin vaikeaa? Mitä asioita?
- Miten koet jäljitettävyyden tarkastamisen?
- Kun ajattelet elintarvikepetosten torjuntaa omassa työssäsi, minkälaisia haasteita sinulle tulee mieleen?
- Mitkä olisivat mielestäsi tärkeimmät asiat, joiden kehittäminen edistäisi petoksellisen toiminnan tunnistamista ja siihen puuttumista työssäsi?
- A. Olet ollut mukana selvittämässä ainakin yhtä elintarvikepetostapausta. Miten selvitys eteni ja minkälaisia ajatuksia se sinussa herätti? TAI B. Ajatellaan tilannetta, jossa sinulle syntyy epäily elintarvikepetoksesta jossakin valvontakohteessasi. Minkälaiset valmiudet tapauksen selvittämiseen ajattelisit itselläsi tai yksikössäsi olevan?
- Elintarvikelain mukaan valvontaviranomainen voi jättää esitutkintaviranomaiselle ilmoittamatta rikkomuksen, jos teko tai laiminlyönti on vähäinen eikä kyseessä ole niskoittelu viranomaisen kieltoja ja määräyksiä vastaan. Minkälaisena koet tämän arvioinnin?
- Elintarvikealan toimijan luotettavuutta on voinut arvioida velvoitteidenhoitoselvityksen avulla kesäkuusta 2020 lähtien. Oletko kuullut tästä? Mitä ajatuksia tämä herättää?
- Millaisena koet yhteistyön muiden viranomaisten, kuten muiden valvontayksiköiden, Ruokaviraston ja poliisin kanssa?
- Minkälaisena koet tiedonkulun oman valvontayksikkösi ja muiden viranomaisten, kuten muiden valvontayksiköiden, Ruokaviraston ja poliisin välillä?
- Haluaisitko mahdollisen elintarvikepetoksen havaitsemista tai selvittämistä ajatellen käyttöösi jotakin tietoa, jota ei ole nyt saatavilla? Mitä?
- Onko valvontayksikkönne alueella jonkin erityispiirre, joka vaikuttaa valvontaan alueellanne? Mikä ja miten se vaikuttaa?
- Olisiko teillä yksikössäanne tai alueellanne jokin hyväksi todettu aiheeseen liittyvä käytäntö, jonka haluaisit jakaa muille?
- Onko jokin aihe tai aihepiiri, josta toivoisit tutkimustietoa?
- Haluatko vielä kertoa jotain mikä liittyy haastattelun aiheeseen?

### Supplementary data 3

Supplementary table 1. Respondent- and unit-related background factors of respondents who inspected food establishments stratified by whether the respondent had suspected or detected food fraud

| Factor                             | All respondents who perform inspections (detectors/non-detectors <sup>a</sup> ) | % of respondents |               | p-value (Fisher's exact) |
|------------------------------------|---------------------------------------------------------------------------------|------------------|---------------|--------------------------|
|                                    |                                                                                 | Detectors        | Non-detectors |                          |
| Respondent-related                 |                                                                                 |                  |               |                          |
| Level of education                 |                                                                                 |                  |               |                          |
| Vocational education               | 2 (1/1)                                                                         | 50.0             | 50.0          | 0.914                    |
| Bachelor's degree                  | 29 (21/8)                                                                       | 72.4             | 27.6          |                          |
| Master's degree or higher          | 50 (34/16)                                                                      | 68.0             | 32.0          |                          |
| Work experience in food control    |                                                                                 |                  |               |                          |
| 0–4 years                          | 18 (12/6)                                                                       | 66.7             | 33.3          | 0.269                    |
| 5–9 years                          | 17 (9/8)                                                                        | 52.9             | 47.1          |                          |
| 10–14 years                        | 18 (15/3)                                                                       | 83.3             | 16.7          |                          |
| ≥15 years                          | 26 (19/7)                                                                       | 73.1             | 26.9          |                          |
| Number of establishments inspected |                                                                                 |                  |               |                          |
| <100 establishments                | 28 (16/12)                                                                      | 57.1             | 42.9          | 0.203                    |
| 100–199 establishments             | 32 (25/7)                                                                       | 78.1             | 21.9          |                          |
| ≥200 establishments                | 13 (10/3)                                                                       | 76.9             | 23.1          |                          |
| Unit-related                       |                                                                                 |                  |               |                          |
| Human resources in food control    |                                                                                 |                  |               |                          |
| 0–4 person-years                   | 23 (15/8)                                                                       | 65.2             | 34.8          | 0.511                    |
| 5–9 person-years                   | 21 (1/10)                                                                       | 52.4             | 47.6          |                          |
| ≥10 person-years                   | 8 (6/2)                                                                         | 75.0             | 25.0          |                          |
| Number of establishments           |                                                                                 |                  |               |                          |
| <500 establishments                | 12 (9/3)                                                                        | 75.0             | 25.0          | 0.886                    |
| 500–1000 establishments            | 26 (17/9)                                                                       | 65.4             | 34.6          |                          |
| >1000 establishments               | 28 (19/9)                                                                       | 67.9             | 32.1          |                          |

<sup>a</sup>Respondents who had suspected or detected food fraud vs. respondents who had not.
